# Supplementary material for: 2,3,7,8-Tetrachlorodibenzo-p-dioxin poly(ADP-ribose) polymerase (TiPARP, ARTD14) is a mono-ADP-ribosyltransferase and repressor of aryl hydrocarbon receptor transactivation
Source: PubMed Central journal article supplement — Nucleic Acids Res. 2012 Dec 25;41(3):1604–21. doi: 10.1093/nar/gks1337 (PMC3562000; doi:10.1093/nar/gks1337), 2012-12-25
Supplement: supp_gks1337_nar-02106-v-2012-File011.pdf [file supp_gks1337_nar-02106-v-2012-File011.pdf]

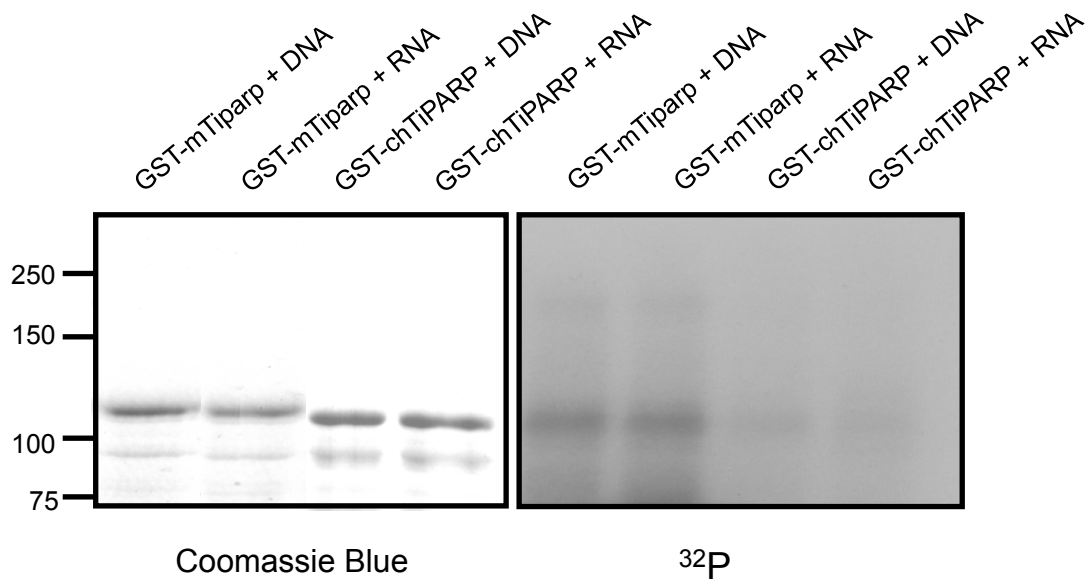

**S1. Auto-ADP-ribosylation of mouse Tiparp (mTiparp) and chicken TiPARP (chTiPARP) incubated with DNA or RNA.** Mouse GST-tagged Tiparp (GST-mTiparp) and chicken GST-tagged TiPARP (GST-chTiPARP) were incubated with <sup>32</sup>P-NAD<sup>+</sup> and activated DNA or DNase-treated RNA and analyzed by SDS-PAGE and autoradiography.

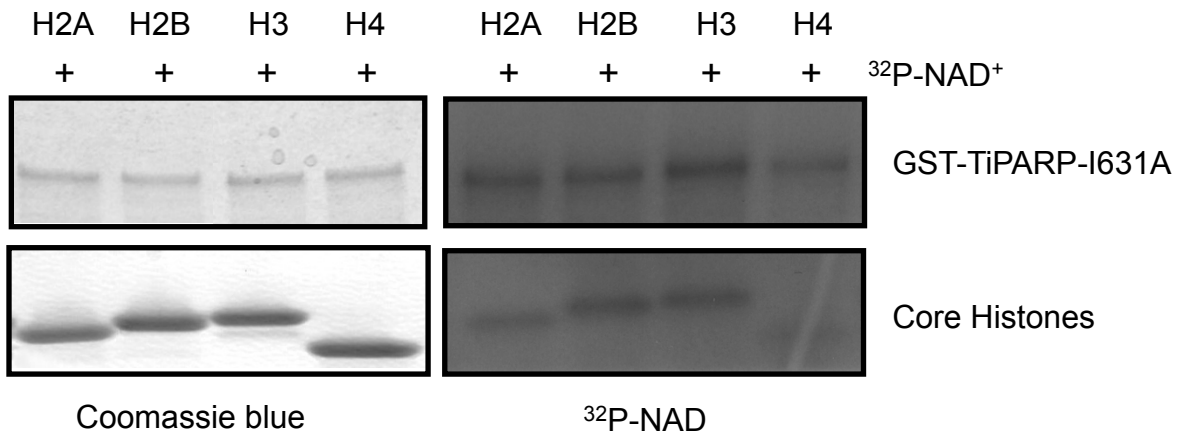

**S2. Hetero-ADP-ribosylation of core histones by TiPARP catalytic mutant I631A.** GST-TiPARP-I631A was incubated with <sup>32</sup>P-NAD<sup>+</sup> and histones H2A, H2B, H3 or H4 and analyzed by SDS-PAGE and autoradiography.

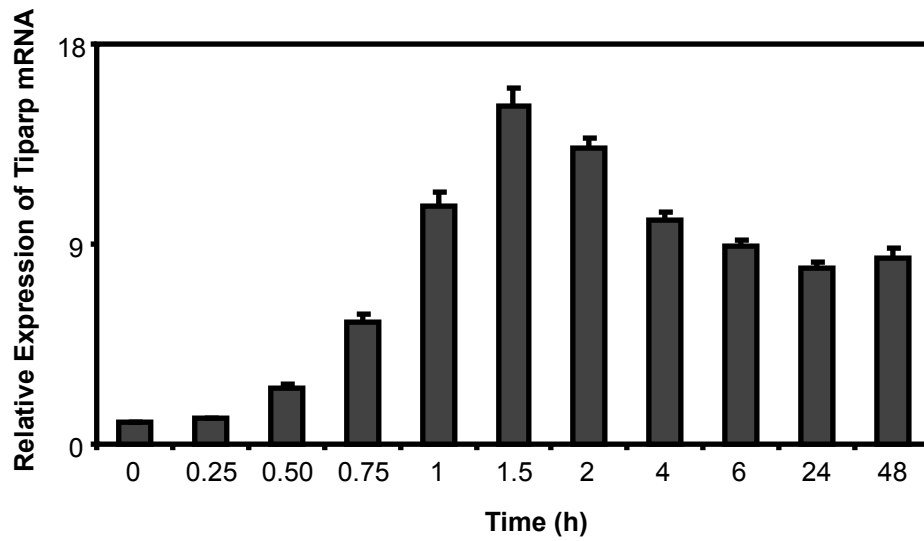

**S3. Temporal analysis of TCDD-induced Tiparp mRNA expression levels in Hepa1c1c7 cells.** Hepa1c1c7 cells were treated with 10 nM TCDD at the times indicated. Data were presented as means  $\pm$  S.E.M. of three independent replicates.

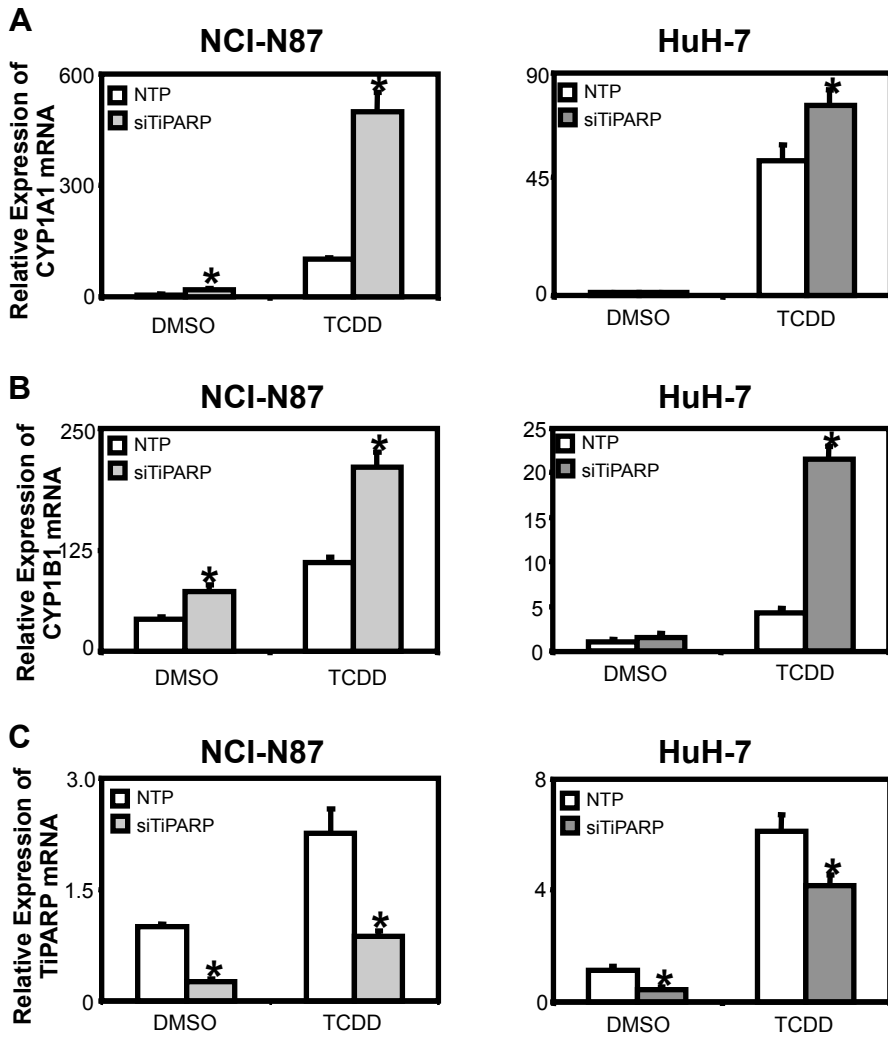

**S4. Pooled RNAi-mediated TiPARP knockdown in NCI-N87, and HuH-7 cells.** Cell lines were transfected with siRNA pool (containing four different siRNAs) targeting against TiPARP for 48 h. Cells were then treated with 10 nM TCDD and DMSO (control) for 24 h and RNA was isolated and reverse transcribed as described in the Materials and Methods. Changes in (A) CYP1A1; (B) CYP1B1; and (C) TiPARP mRNA expression was then determined using qPCR. Data were normalized to non-targeting pool (NTP) DMSO (control) and to  $\beta$ -actin levels of each cell line. Results shown were means  $\pm$  S.E.M for at least four independent experiments. mRNA expression levels for each cell line significantly ( $P < 0.05$ ) different than NTP transfected cells were denoted with an asterisk.

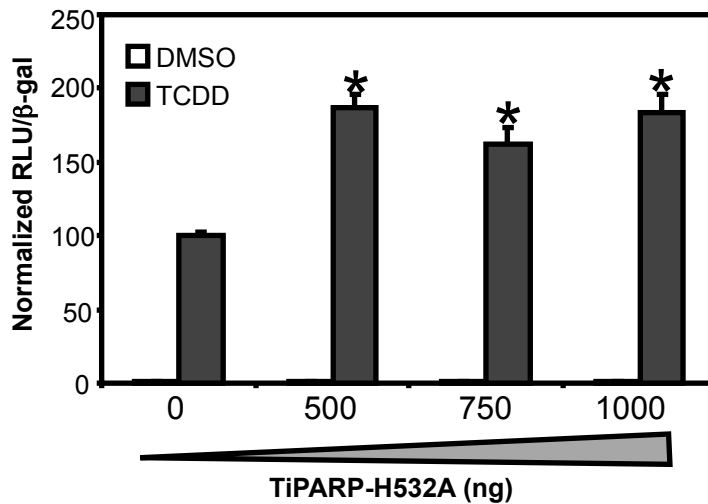

**S5. Dose-response of TiPARP H532A catalytic mutant in HuH-7 cells.** HuH-7 cells were plated and co-transfected with varying amounts of pcDNA-TiPARP-H532A construct (0-1000 ng) and pCYP1A1-luc. Transfected cells were treated with TCDD for 24 h and reporter gene assays were performed as described in Materials and Methods. Results shown were means  $\pm$  S.E.M. of two independent replicates. Luciferase activity significantly ( $P < 0.05$ ) different than empty vector transfected cells was denoted with an asterisk.

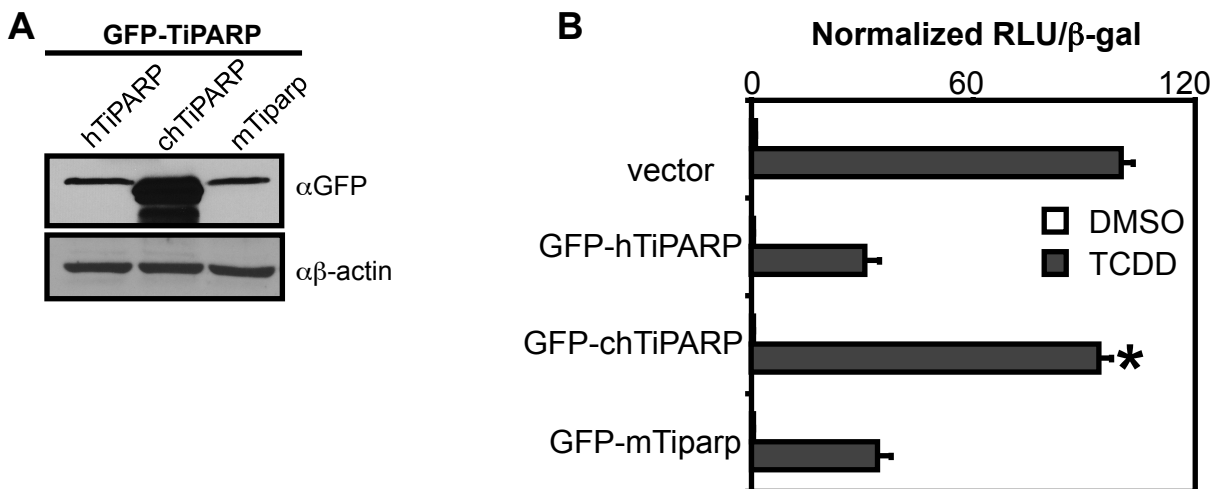

**S6. (A) Overexpression of GFP-tagged human (hTiPARP), chicken (ChTiPARP) and mouse TiPARP (mTiparp) in HuH-7 cells.** HuH-7 cells were transfected with pEGFP-TiPARP construct for 48 h. Proteins were detected by Western blot using  $\alpha$ GFP antibody. **(B) The effect of overexpression of GFP-tagged human, chicken and mouse TiPARP on CYP1A1-Luc.** HuH-7 cells were transiently co-transfected with pEGFP-TiPARP construct and pCYP1A1-luc as described in Materials and Methods. Results shown were means  $\pm$  S.E.M. of at least two independent replicates. Luciferase activity significantly ( $P < 0.05$ ) different than GFP-hTiPARP transfected cells was denoted with an asterisk.

**A**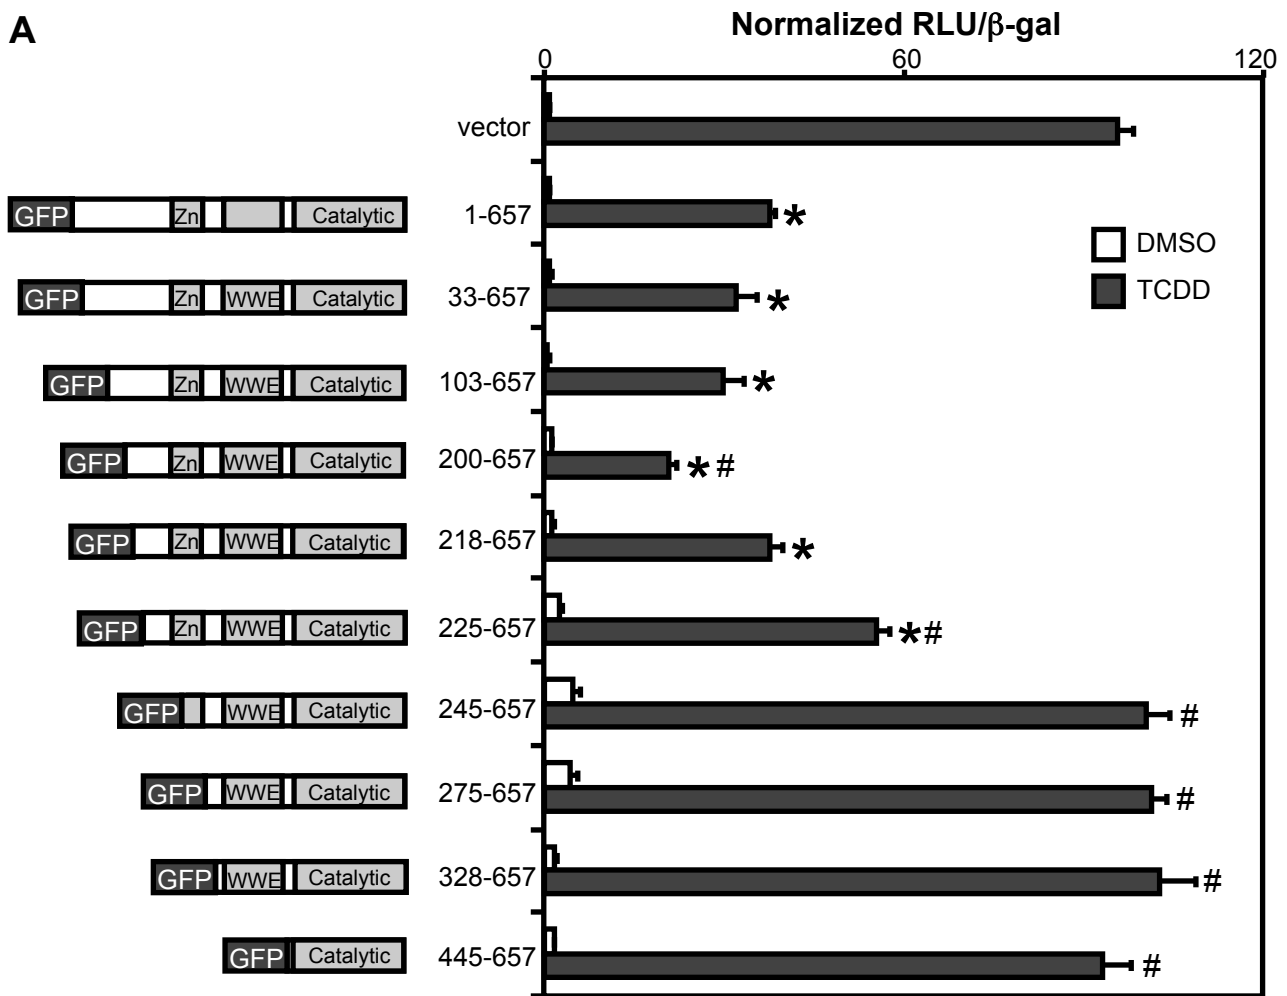**B**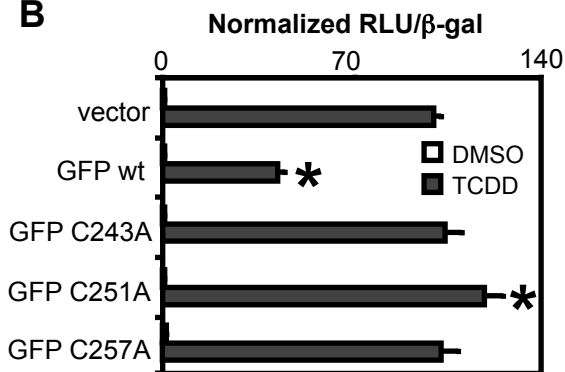**C**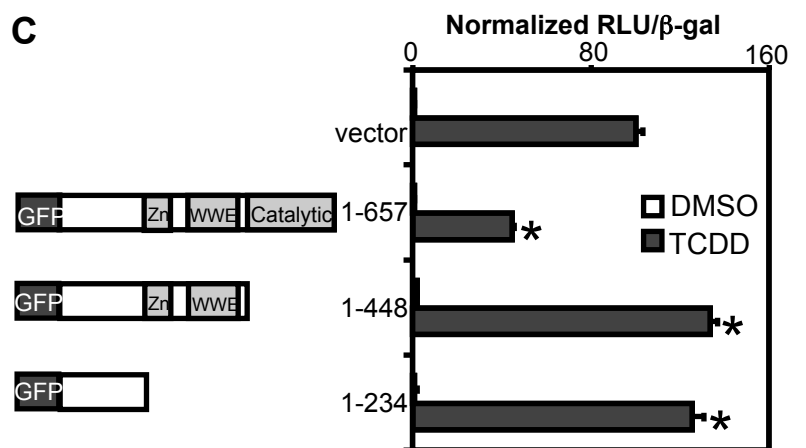**D**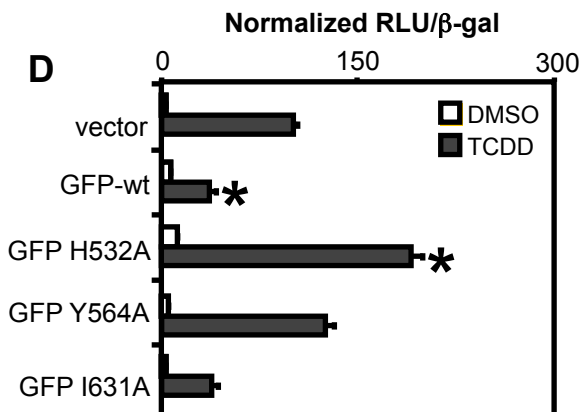

**S7. The effect of GFP-tagged TiPARP N-terminal truncations (A), zinc finger point mutants (B), C-terminal truncations (C), catalytic point mutants (D) on reporter gene activity.** Full-length GFP-TiPARP (1-657, wt), GFP-TiPARP truncation or point mutant constructs were co-overexpression with pCYP1A1-luc in HuH-7 cells and treated with TCDD. Data were presented as means  $\pm$  S.E.M from three independent experiments and significance analyzed by one-way ANOVA and Tukey's multiple comparisons test. Reporter gene activity significantly different than ( $P < 0.05$ ) TCDD-treated empty vector or TiPARP (1-657) was denoted with an asterisk or pound sign, respectively.

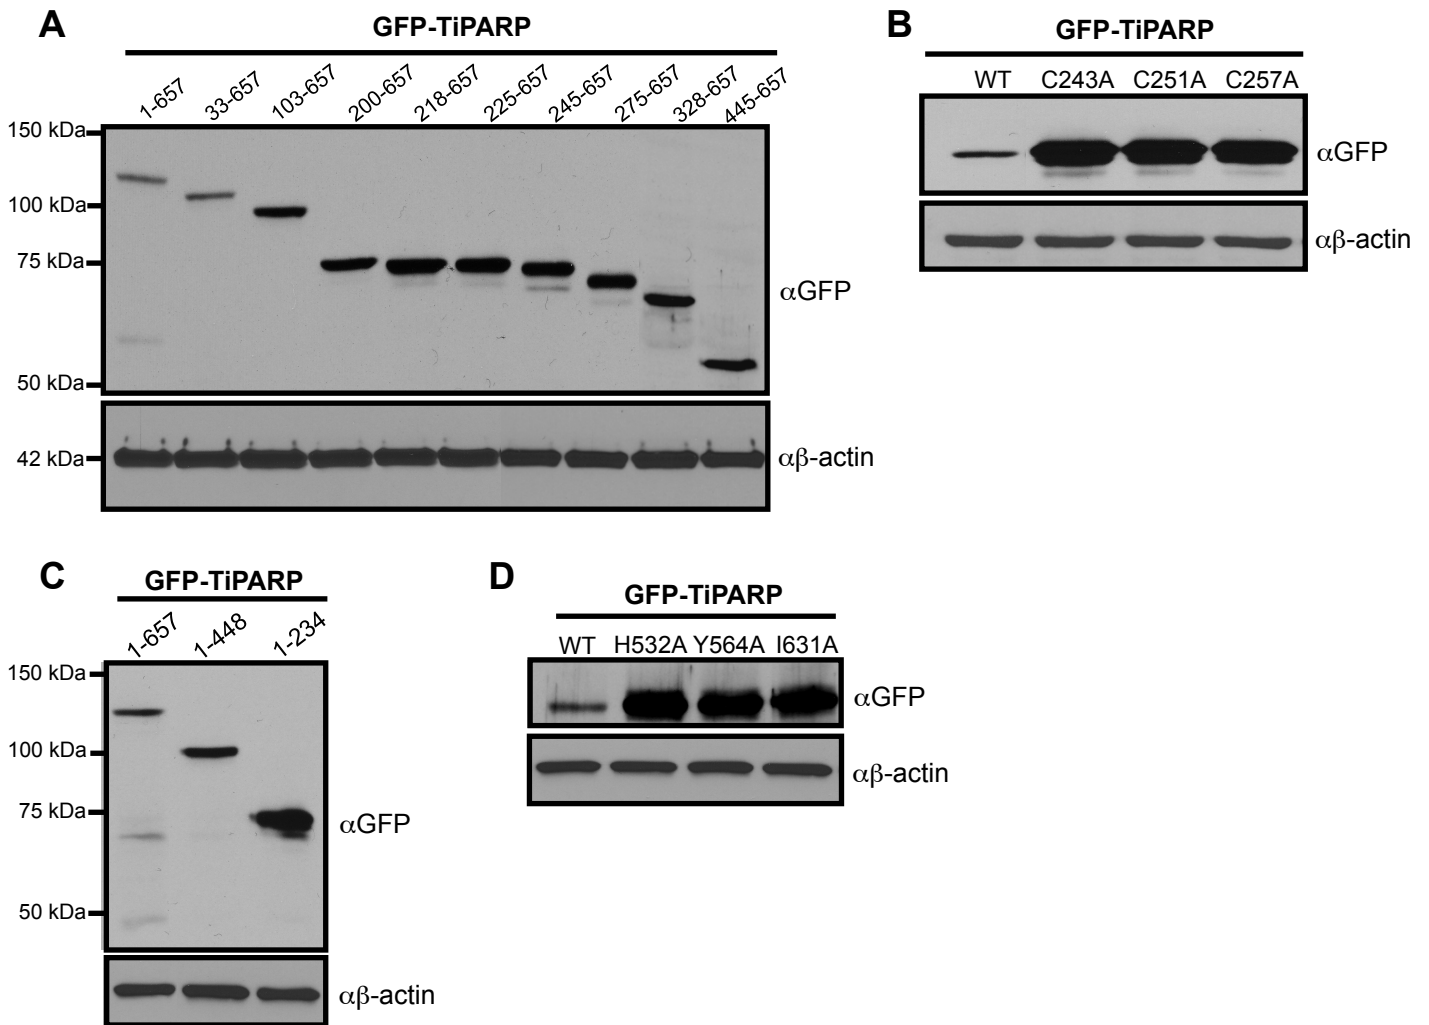

**S8. Overexpression of GFP-tagged TiPARP N-terminal truncations (A), zinc finger point mutants (B), C-terminal truncations (C), catalytic mutants (D).** HuH-7 cells were transfected with pEGFP-TiPARP constructs for 48 h. Proteins were detected by Western blot using  $\alpha$ GFP antibody. Representative blots of three independent replicates.

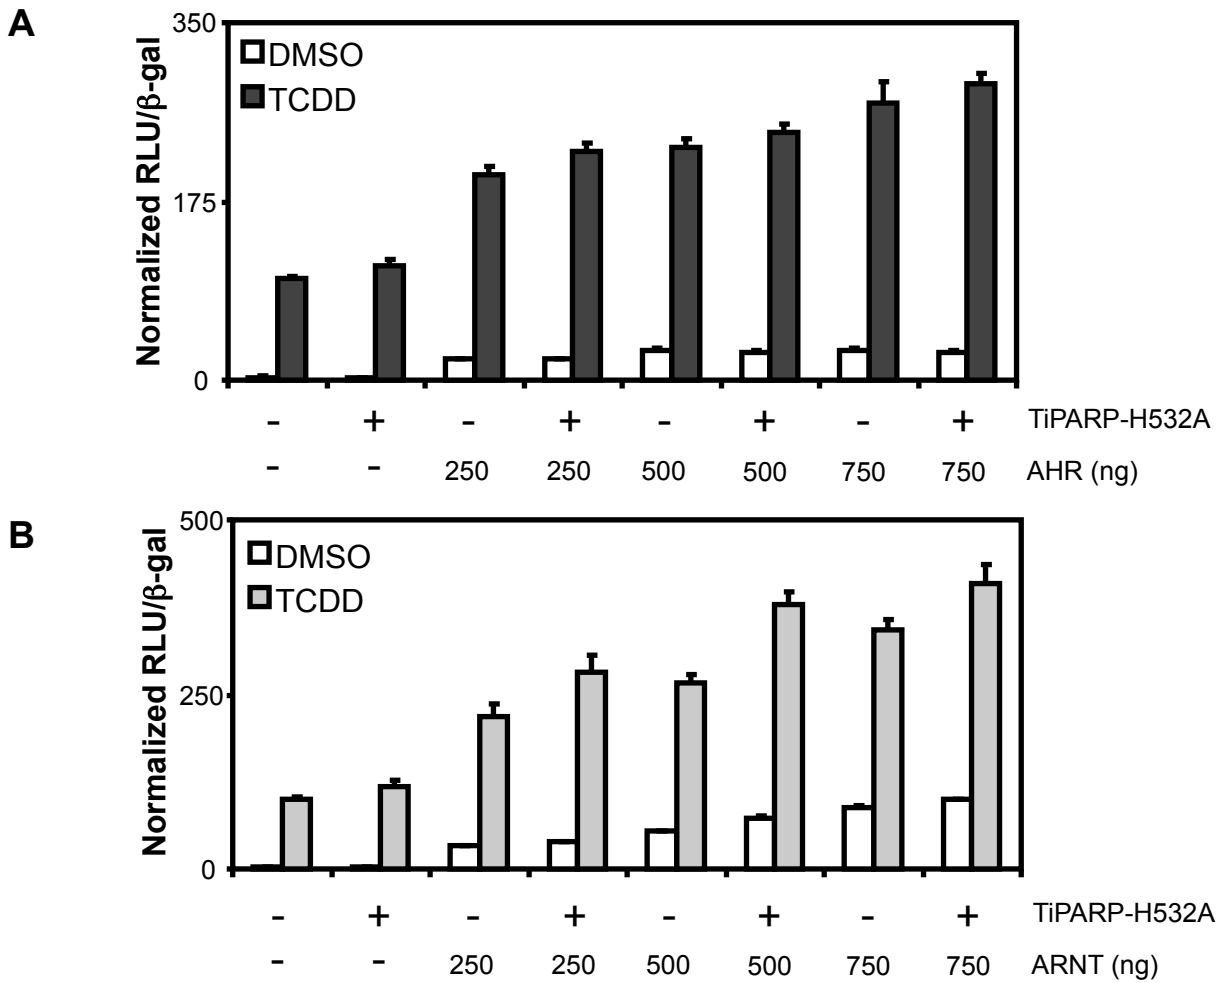

**S9. Ectopic AHR and ARNT rescue was not observed with TiPARP catalytic mutant H532A.** HuH-7 cells were co-transfected with pCYP1A1-luc, TiPARP-H532A (200 ng) and (A) AHR (250-750 ng) or (B) ARNT. Results were shown as means  $\pm$  S.E.M from two independent experiments.

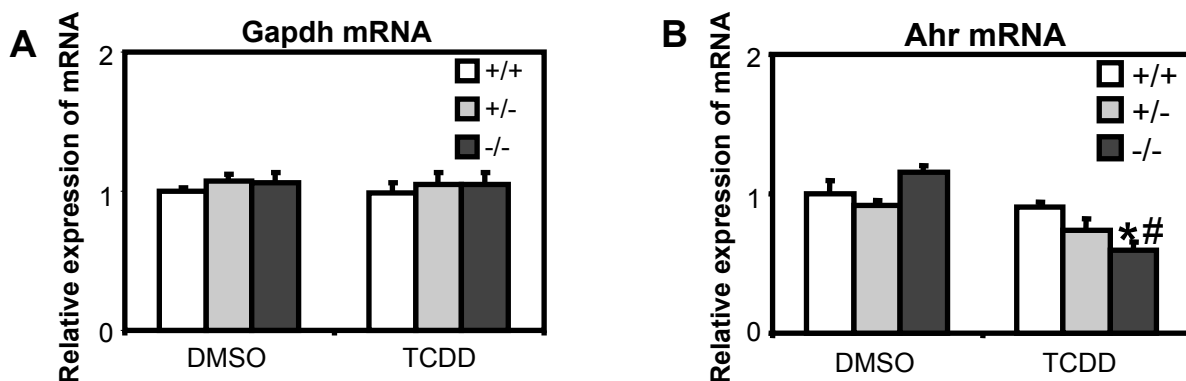

**S10. Expression of Gapdh mRNA (A) and Ahr mRNA (B) in *Tiparp*-wildtype (+/+), het (+/-) and -null (-/-) mouse embryonic fibroblasts.** MEF lines were treated with DMSO or TCDD for 24 h and RNA was isolated as described in Materials and Methods. Data were normalized to wildtype DMSO-treated cells and to  $\beta$ -actin levels. Results shown were means  $\pm$  S.E.M for three independent experiments. mRNA expression levels significantly ( $P < 0.05$ ) different than genotype-matched DMSO-treated cells are denoted with an asterisk. mRNA expression levels significantly ( $P < 0.05$ ) different than treatment-matched wildtype (+/+) cells were denoted with a pound sign.

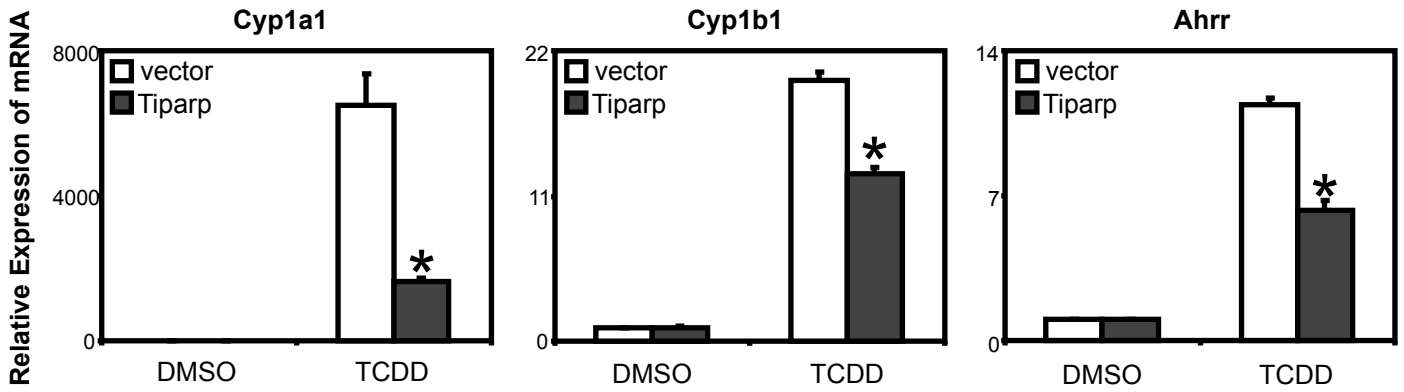

**S11. Genetic Complementation of *Tiparp*<sup>-/-</sup> MEFs with mouse *Tiparp*.** *Tiparp*<sup>-/-</sup> MEFs were transfected with 2 μg pcDNA-mTiparp or pcDNA (vector). Following 24 h transfected cells were treated with TCDD for 24 h and RNA was isolated and reverse transcribed as described in Materials and Methods. Data presented were representative of means ± S.E.M. of three independent experiments. mRNA expression significantly ( $P < 0.05$ ) different than treatment-match and vector transfected cells was denoted with an asterisk.

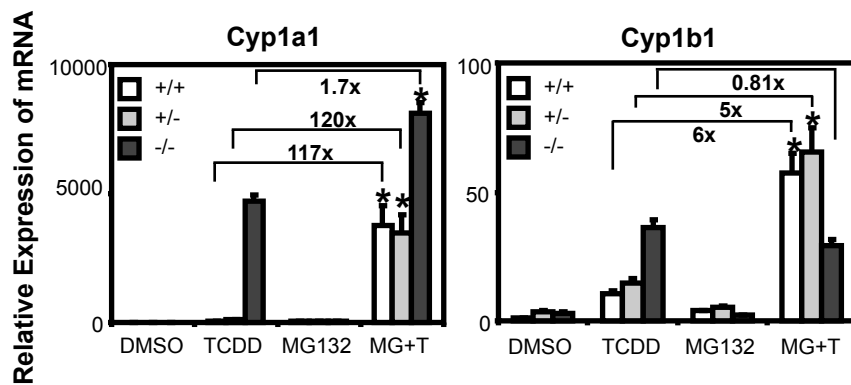

**S12. TipARP is a labile negative regulator of AHR.** *Tiparp*<sup>-/-</sup> MEFs were treated with 10 nM TCDD or 25 mM MG-132 (MG) alone or in combination. The expression levels of CYP1A1 and CYP1B1 were determined by qPCR as described in Materials and Methods. Data presented were representative of means ± S.E.M. of three independent experiments. Gene expression levels significantly different ( $P < 0.05$ ) than TCDD alone within each genotype were denoted with an asterisk.
